# Supplementary material for: Changes within the central stalk of E. coli F1Fo ATP synthase observed after addition of ATP
Source: PubMed Central journal article supplement (PMC9834311; doi:10.1038/s42003-023-04414-z), 2023-01-11
Supplement: 42003_2023_4414_MOESM2_ESM.pdf [file 42003_2023_4414_MOESM2_ESM.pdf]

## **SUPPLEMENTARY INFORMATION**

**Changes within the central stalk of *E. coli* F<sub>1</sub>F<sub>0</sub> ATP synthase observed after addition of  
ATP**

Meghna Sobti et al.

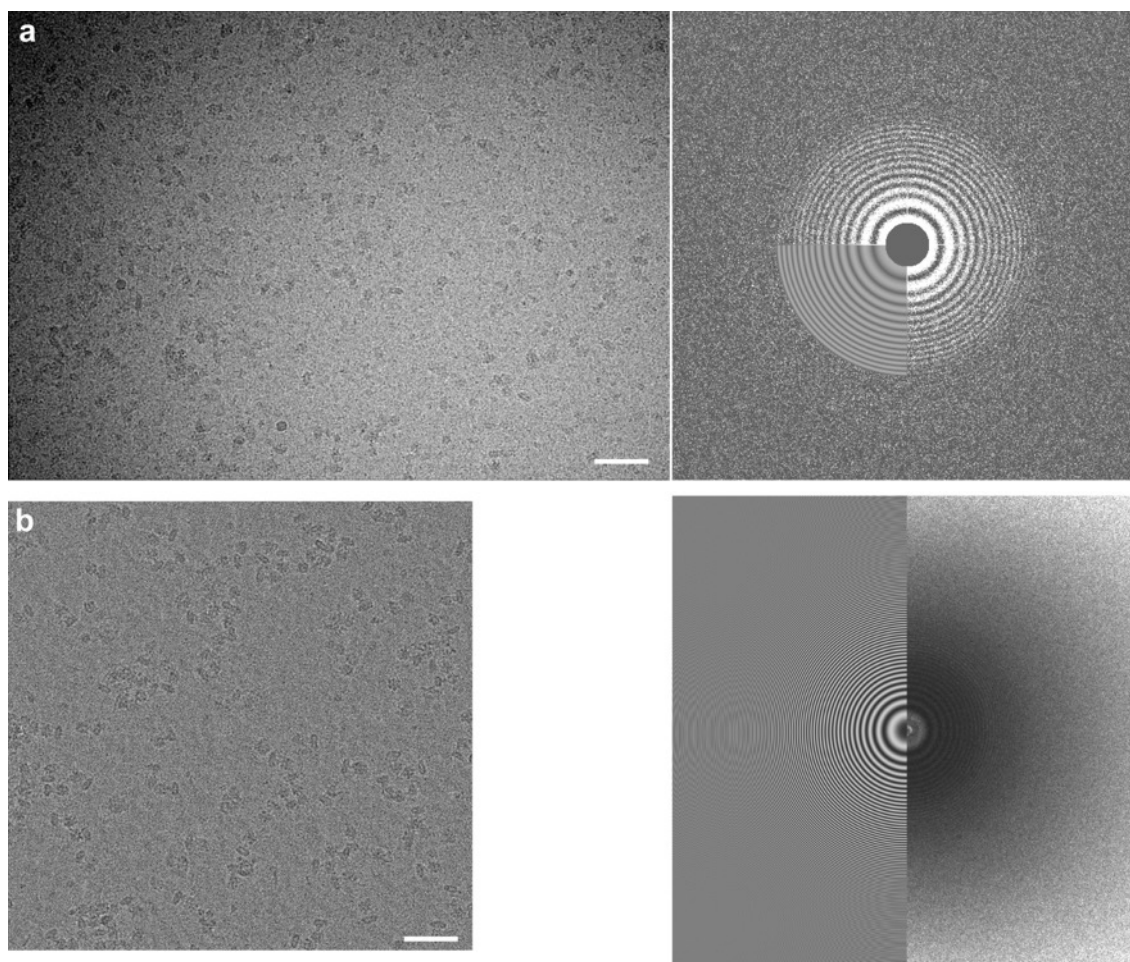

**Supplementary Fig. 1: Cryo-EM micrographs and power spectrums.** (a) WT *E. coli* F<sub>1</sub>F<sub>0</sub> ATP synthase. (b)  $\epsilon\Delta$ CTH *E. coli* F<sub>1</sub>F<sub>0</sub> ATP synthase. (left panels) Representative micrograph showing ATP synthase particles (white scale bar is equivalent to 50 nm) and (right panels) power spectrum of same micrograph. The data was taken on a distinct sample, we have imaged *E. coli* ATP synthase many times and taken full cryo-EM datasets >10 times. The micrographs shown were chosen to show clear ATP synthase particles (high defocus) and are devoid of ice contamination and particle aggregation.

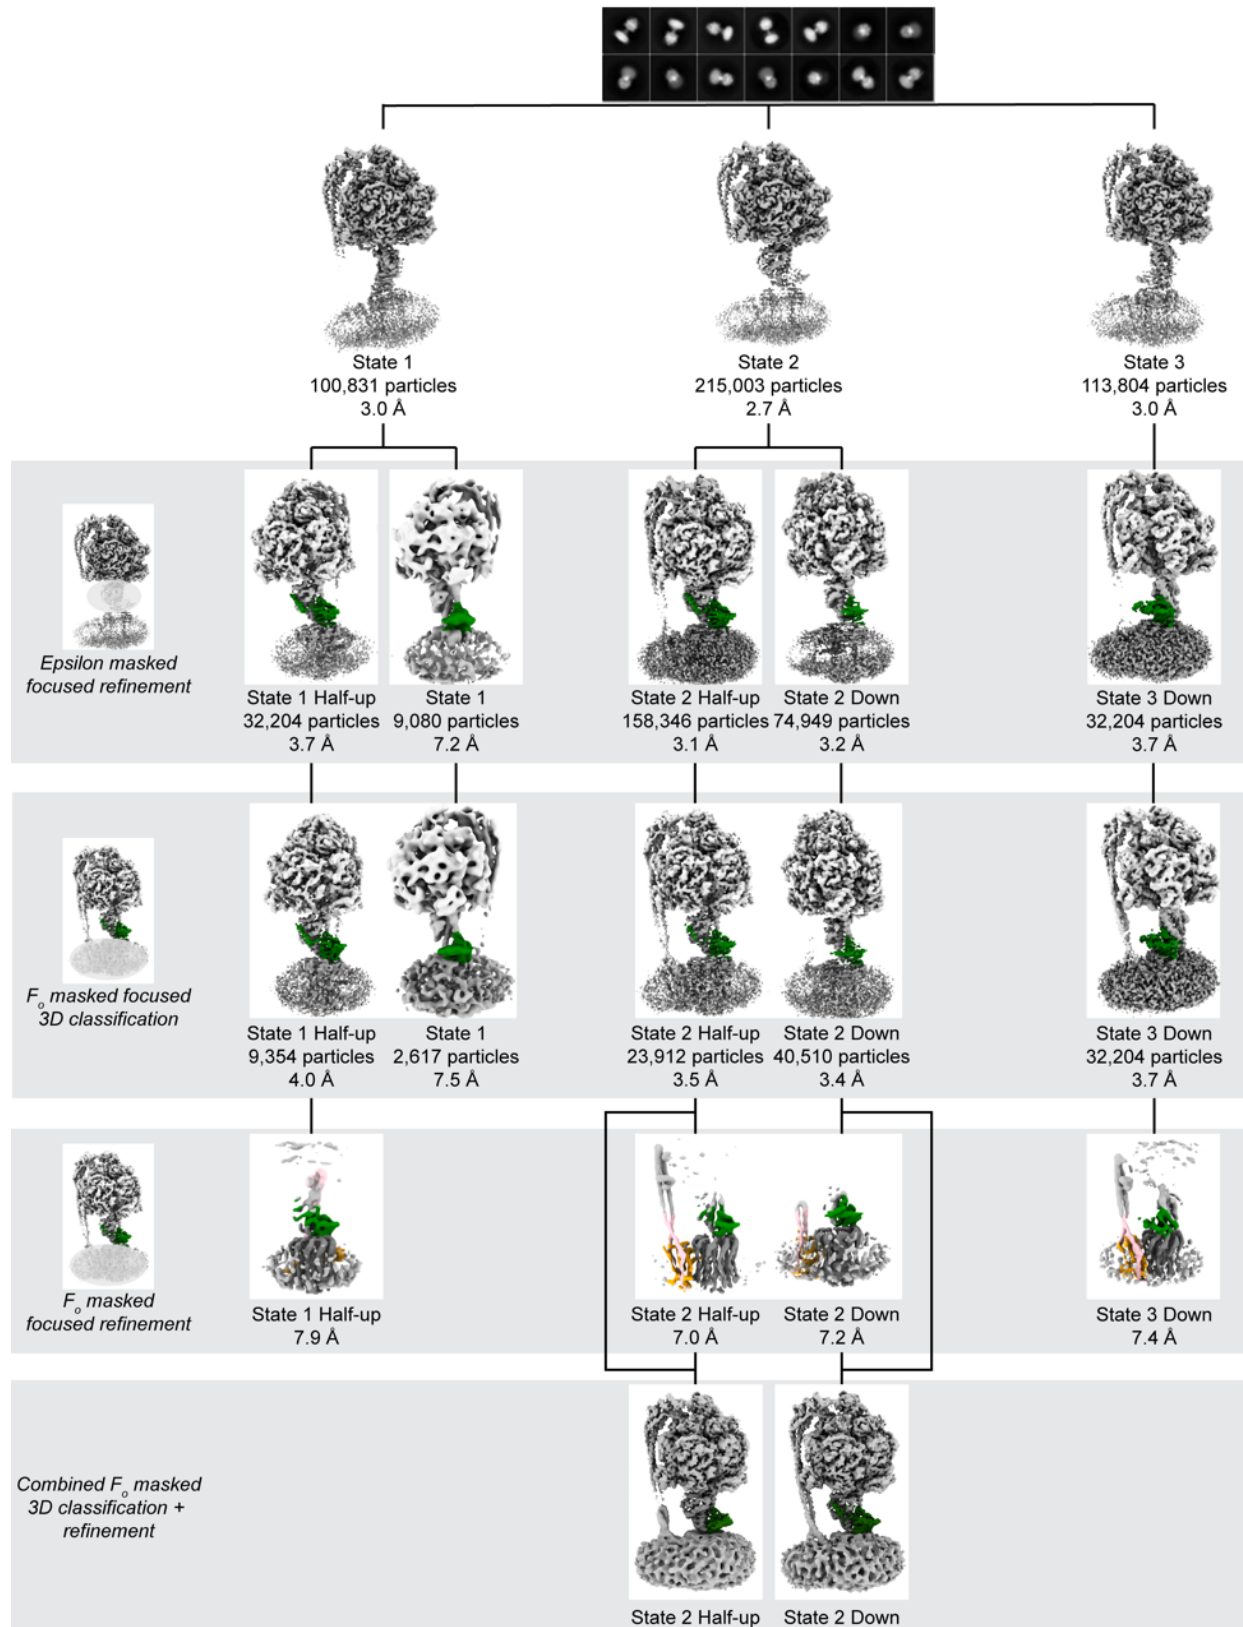

**Supplementary Fig. 2: Flowchart describing the classification of particles into distinct conformations in the WT *E. coli* F<sub>1</sub>F<sub>0</sub> ATP synthase + 10 mM MgATP dataset.**

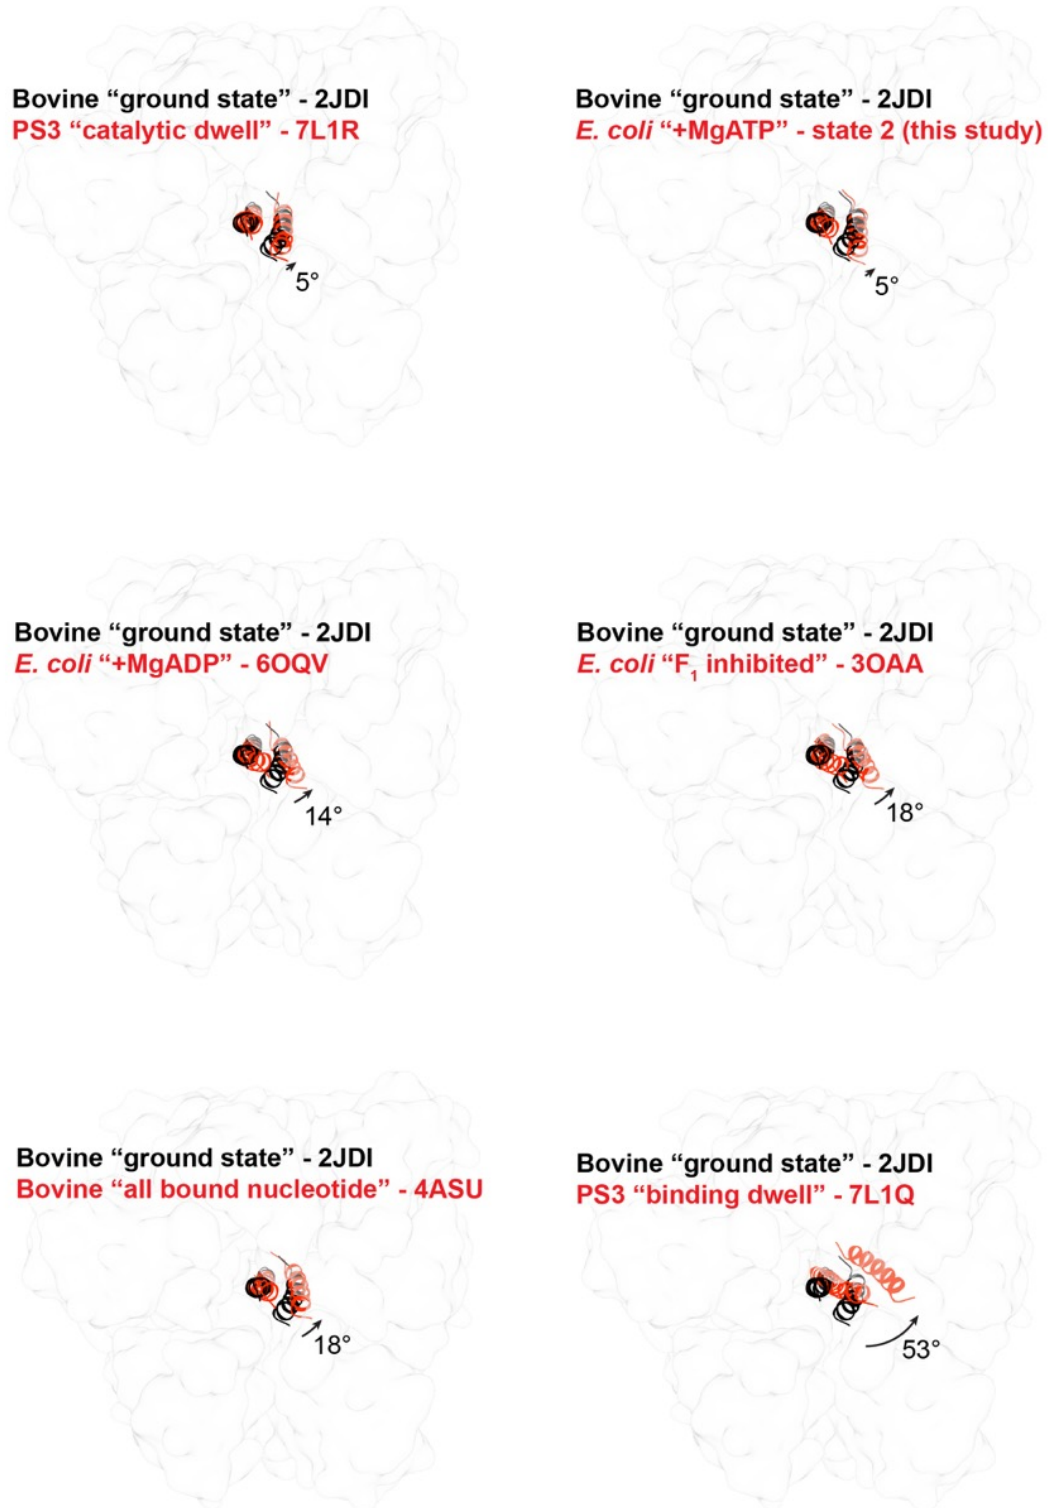

**Supplementary Fig. 3: Comparison of the relative axel rotary position between F<sub>1</sub>-ATPase structures.** Structures were first aligned using the  $\beta$  barrel crown (residues  $\alpha$ 27-136 and  $\beta$ 2-116) and then the rotation angle of the axel (bacterial residues 1-22 & 247-284; bovine residues 1-22 & 233-273) was calculated in Chimera. Bovine mitochondrial F<sub>1</sub>-ATPase ground state in black and comparison structure in red.

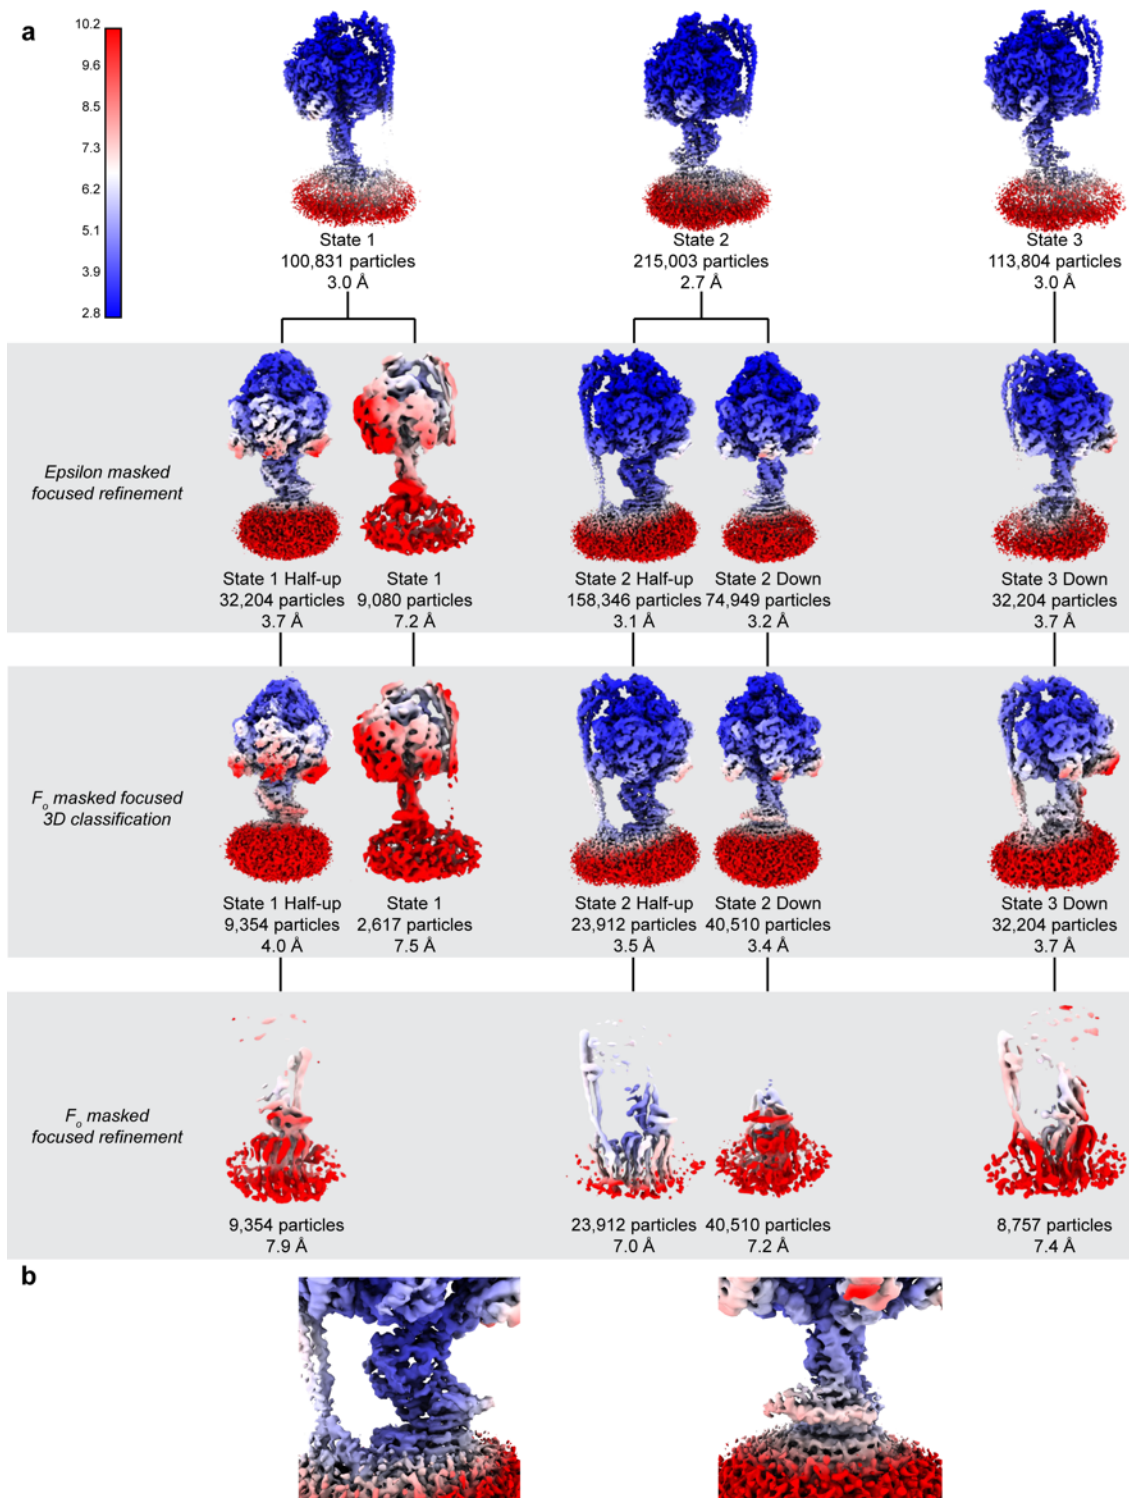

**Supplementary Fig. 4: Local resolution estimates.** Local resolution estimates of maps described in Supplementary Fig. 2 (a) and close ups of the central stalk region in State 2 “half-up” and “down” maps (b) to highlight resolution estimates in this region.

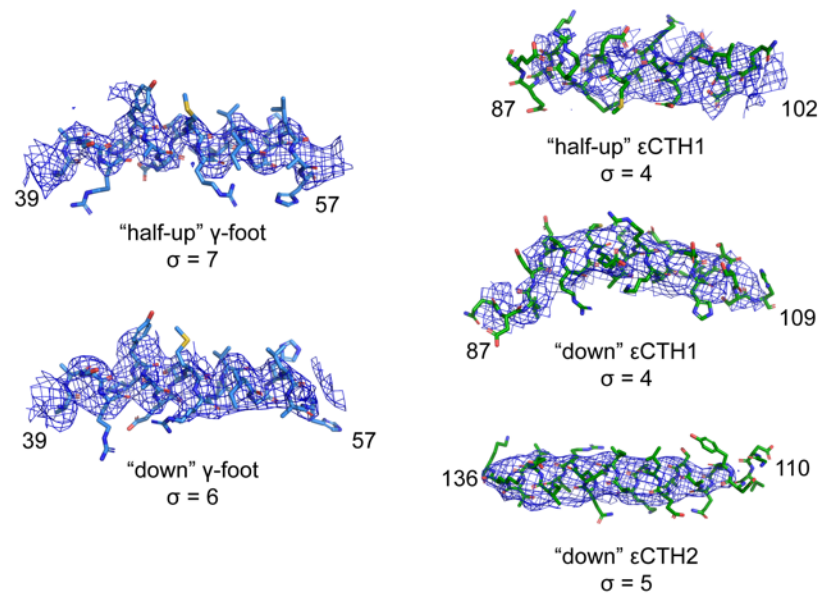

**Supplementary Fig. 5: Cryo-EM maps of the  $\gamma$  foot and  $\epsilon$ CTD in the State 2 “half-up” and “down” sub states.** Close up view of the cryo-EM maps corresponding to the  $\gamma$  foot (residues 39-57),  $\epsilon$ CTH1 (residues 87-102) and  $\epsilon$ CTH2 (residues 110-136).



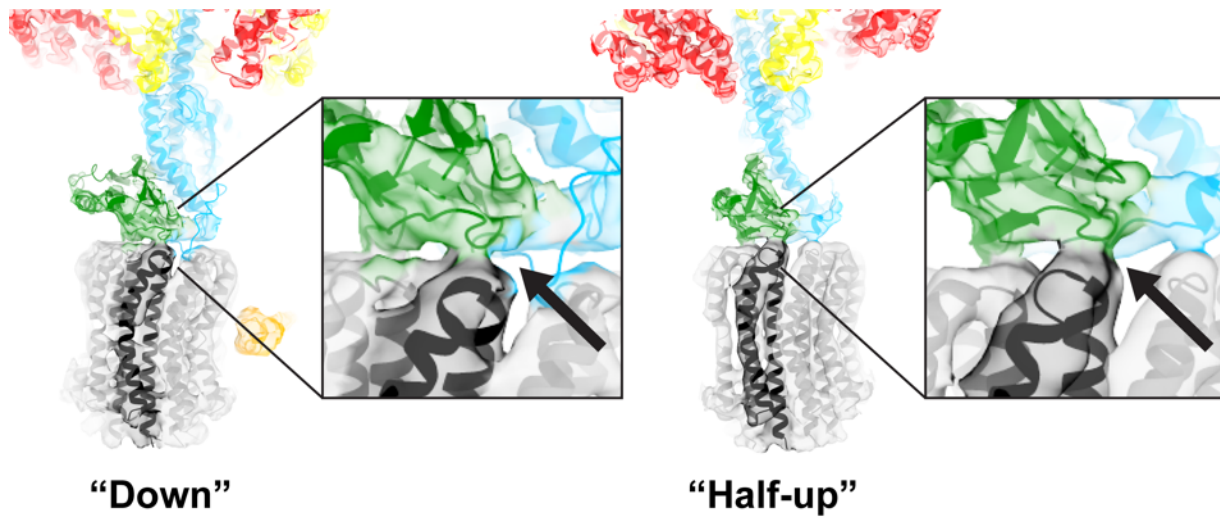

**Supplementary Fig. 6: The interaction of the  $\epsilon$ NTD and c ring facilitates assignment of the c subunits.** Model and maps of State 2 “down” (left) and “half-up” (right) show how relative c subunit rotation was assigned using the interaction with the  $\epsilon$ NTD (indicated with arrow).

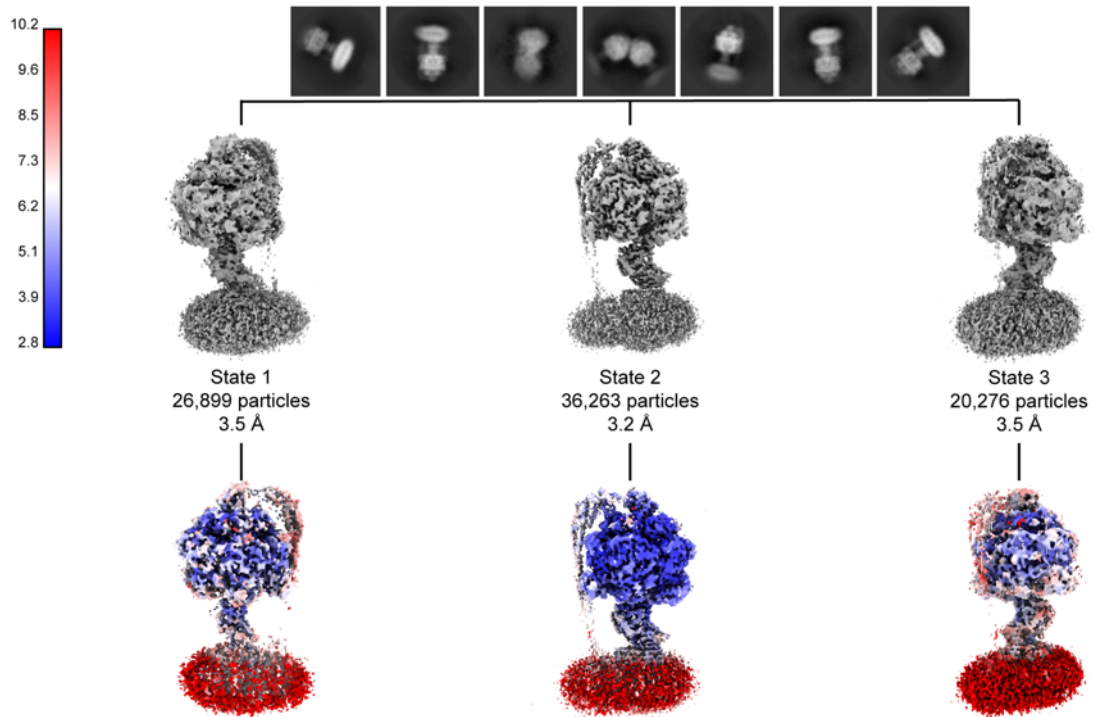

**Supplementary Fig. 7: Flowchart describing the classification of particles into distinct conformations in the  $\epsilon\Delta\text{CTH1}$  *E. coli*  $\text{F}_1\text{F}_0$  ATP synthase + 10 mM MgATP dataset.**



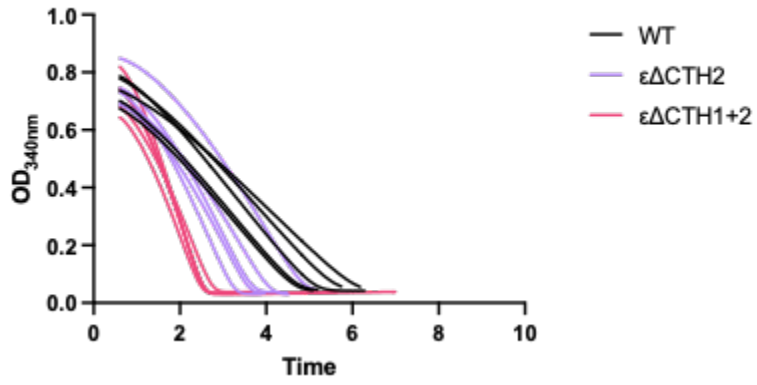

**Supplementary Fig. 8: ATP regeneration assays.** Raw trace for the ATP regeneration assays of WT,  $\epsilon\Delta\text{CTH2}$  and  $\epsilon\Delta\text{CTH1+2}$  mutations.

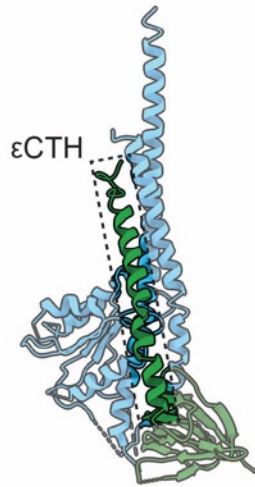

**Supplementary Fig. 9: Subunits  $\gamma$  and  $\epsilon$  from *Bacillus* PS3.** Subunit  $\epsilon$  shows a single extended  $\epsilon$ CTH (highlighted and labelled) that binds in a distinct manner compared to *E. coli*  $\epsilon$ CTD (shown in this study – see Fig. 1b). Model retrieved from PDB:4xd7<sup>1</sup>.

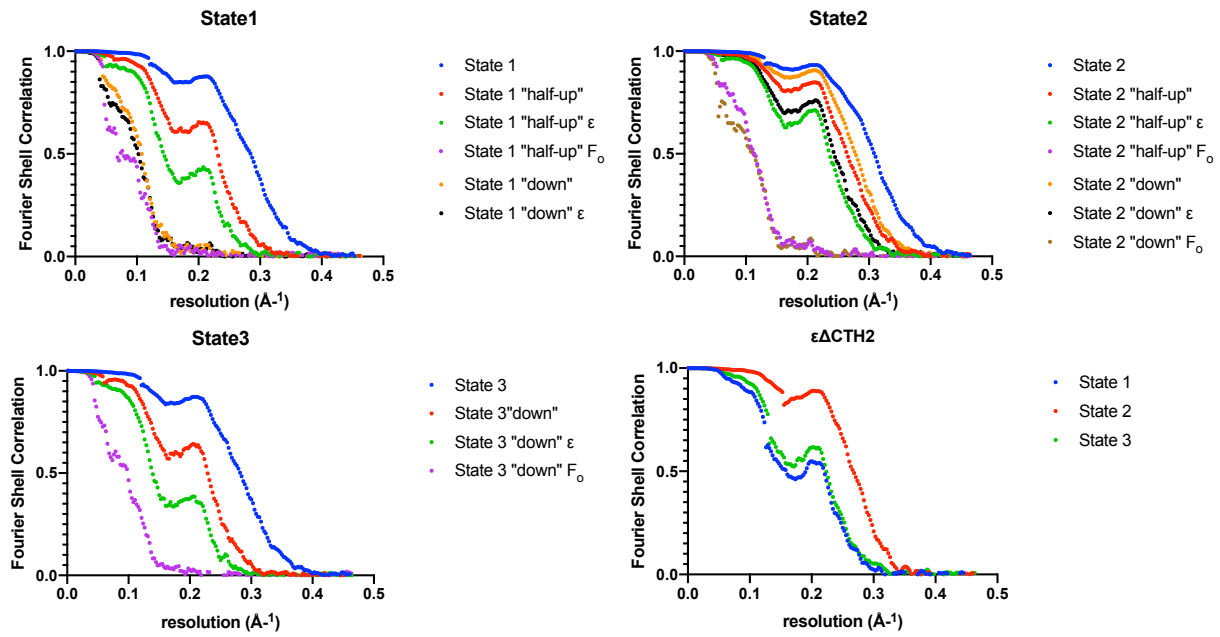

**Supplementary Fig. 10: Fourier shell correlation curves for cryo-EM maps presented in this study.**

|                                                     | #1                            | #2                                                | #3                                                                            | #4                                                       | #5                                    | #6                                                        | #7                                   | #8                                                        | #9                                                                            | #10                                                      | #11                                                    | #12                                                                        | #13                                                   | #14                           | #15                                                     | #16                                                                         | #17                                                    | #18                                                        | #19                                                        | #20                                                        |
|-----------------------------------------------------|-------------------------------|---------------------------------------------------|-------------------------------------------------------------------------------|----------------------------------------------------------|---------------------------------------|-----------------------------------------------------------|--------------------------------------|-----------------------------------------------------------|-------------------------------------------------------------------------------|----------------------------------------------------------|--------------------------------------------------------|----------------------------------------------------------------------------|-------------------------------------------------------|-------------------------------|---------------------------------------------------------|-----------------------------------------------------------------------------|--------------------------------------------------------|------------------------------------------------------------|------------------------------------------------------------|------------------------------------------------------------|
|                                                     | State1<br>(EMD<br>B<br>27296) | State1<br>half-up<br>(EMD<br>B<br>27297)<br>8DBP) | State1<br>half-up<br>Fo<br>classified<br>(EMD<br>B<br>27298)<br>(PDB<br>8DBQ) | State1<br>half-up<br>Fo<br>refine<br>(EMD<br>B<br>27299) | State1<br>down<br>(EMD<br>B<br>27300) | State1<br>down<br>Fo<br>classified<br>(EMD<br>B<br>27301) | State2<br>558<br>(EMD<br>B<br>27302) | State2<br>half-up<br>(EMD<br>B<br>27303)<br>(PDB<br>8DBR) | State2<br>half-up<br>Fo<br>classified<br>(EMD<br>B<br>27304)<br>(PDB<br>8DBS) | State2<br>half-up<br>Fo<br>refine<br>(EMD<br>B<br>27305) | State2<br>down<br>(EMD<br>B<br>27306)<br>(PDB<br>8DBT) | State2<br>down<br>Fo<br>classified<br>(EMD<br>B<br>27307)<br>(PDB<br>8DBU) | State2<br>down<br>Fo<br>refine<br>(EMD<br>B<br>27308) | State3<br>(EMD<br>B<br>27309) | State 3<br>down<br>(EMD<br>B<br>27310)<br>(PDB<br>8DBV) | State 3<br>down<br>Fo<br>classified<br>(EMD<br>B<br>27311)<br>(PDB8<br>DBW) | State 3<br>down<br>Fo<br>refine<br>(EMD<br>B<br>27312) | State1<br>$\epsilon\Delta$ CT<br>H2<br>(EMD<br>B<br>27313) | State2<br>$\epsilon\Delta$ CT<br>H2<br>(EMD<br>B<br>27314) | State3<br>$\epsilon\Delta$ CT<br>H2<br>(EMD<br>B<br>27315) |
| <b>Data collection and processing</b>               |                               |                                                   |                                                                               |                                                          |                                       |                                                           |                                      |                                                           |                                                                               |                                                          |                                                        |                                                                            |                                                       |                               |                                                         |                                                                             |                                                        |                                                            |                                                            |                                                            |
| Magnification                                       | 81,000                        | 81,000                                            | 81,000                                                                        | 81,000                                                   | 81,000                                | 81,000                                                    | 81,000                               | 81,000                                                    | 81,000                                                                        | 81,000                                                   | 81,000                                                 | 81,000                                                                     | 81,000                                                | 81,000                        | 81,000                                                  | 81,000                                                                      | 81,000                                                 | 81,000                                                     | 81,000                                                     | 81,000                                                     |
| Voltage (kV)                                        | 300                           | 300                                               | 300                                                                           | 300                                                      | 300                                   | 300                                                       | 300                                  | 300                                                       | 300                                                                           | 300                                                      | 300                                                    | 300                                                                        | 300                                                   | 300                           | 300                                                     | 300                                                                         | 300                                                    | 300                                                        | 300                                                        | 300                                                        |
| Electron exposure (e <sup>-</sup> /Å <sup>2</sup> ) | 48                            | 48                                                | 48                                                                            | 48                                                       | 48                                    | 48                                                        | 48                                   | 48                                                        | 48                                                                            | 48                                                       | 48                                                     | 48                                                                         | 48                                                    | 48                            | 48                                                      | 48                                                                          | 48                                                     | 48                                                         | 48                                                         | 48                                                         |
| Defocus range (µm)                                  | 0.8-3.5                       | 0.8-3.5                                           | 0.8-3.5                                                                       | 0.8-3.5                                                  | 0.8-3.5                               | 0.8-3.5                                                   | 0.8-3.5                              | 0.8-3.5                                                   | 0.8-3.5                                                                       | 0.8-3.5                                                  | 0.8-3.5                                                | 0.8-3.5                                                                    | 0.8-3.5                                               | 0.8-3.5                       | 0.8-3.5                                                 | 0.8-3.5                                                                     | 0.8-3.5                                                | 0.8-3.5                                                    | 0.8-3.5                                                    | 0.8-3.5                                                    |
| Pixel size (Å)                                      | 1.08                          | 1.08                                              | 1.08                                                                          | 1.08                                                     | 1.08                                  | 1.08                                                      | 1.08                                 | 1.08                                                      | 1.08                                                                          | 1.08                                                     | 1.08                                                   | 1.08                                                                       | 1.08                                                  | 1.08                          | 1.08                                                    | 1.08                                                                        | 1.08                                                   | 1.08                                                       | 1.08                                                       | 1.08                                                       |
| Symmetry imposed                                    | C1                            | C1                                                | C1                                                                            | C1                                                       | C1                                    | C1                                                        | C1                                   | C1                                                        | C1                                                                            | C1                                                       | C1                                                     | C1                                                                         | C1                                                    | C1                            | C1                                                      | C1                                                                          | C1                                                     | C1                                                         | C1                                                         | C1                                                         |
| Initial particle images (no.)                       | 429,63                        | 429,63                                            | 429,63                                                                        | 429,63                                                   | 429,63                                | 429,63                                                    | 429,63                               | 429,63                                                    | 429,63                                                                        | 429,63                                                   | 429,63                                                 | 429,63                                                                     | 429,63                                                | 429,63                        | 429,63                                                  | 429,63                                                                      | 429,63                                                 | 83,440                                                     | 83,440                                                     | 83,440                                                     |
| Final particle images (no.)                         | 100,83                        | 33,587                                            | 9,354                                                                         | 9,254                                                    | 9,080                                 | 2,617                                                     | 215,00                               | 74,946                                                    | 23,917                                                                        | 23,917                                                   | 159,24                                                 | 40,510                                                                     | 40,510                                                | 113,80                        | 32,204                                                  | 8,757                                                                       | 8,757                                                  | 26,899                                                     | 36,263                                                     | 20,276                                                     |
| Map resolution (Å)                                  | 3.0                           | 3.6                                               | 4.0                                                                           | 7.4                                                      | 7.2                                   | 7.8                                                       | 2.7                                  | 3.2                                                       | 3.5                                                                           | 7.0                                                      | 3.1                                                    | 3.4                                                                        | 7.2                                                   | 3.0                           | 3.7                                                     | 4.1                                                                         | 7.4                                                    | 4.0                                                        | 3.3                                                        | 3.9                                                        |
| 0.143 FSC threshold                                 |                               |                                                   |                                                                               |                                                          |                                       |                                                           |                                      |                                                           |                                                                               |                                                          |                                                        |                                                                            |                                                       |                               |                                                         |                                                                             |                                                        |                                                            |                                                            |                                                            |
| <b>Refinement</b>                                   |                               |                                                   |                                                                               |                                                          |                                       |                                                           |                                      |                                                           |                                                                               |                                                          |                                                        |                                                                            |                                                       |                               |                                                         |                                                                             |                                                        |                                                            |                                                            |                                                            |
| Initial models used (PDB codes)                     | -                             | 6OQT                                              | 6OQT                                                                          | -                                                        | -                                     | -                                                         | -                                    | 6OQV                                                      | 6OQV                                                                          | -                                                        | 6OQV,                                                  | 6OQV,                                                                      | -                                                     | -                             | 6OQW                                                    | 6OQW                                                                        | -                                                      | -                                                          | -                                                          | -                                                          |
| Model resolution (Å)                                | -                             | 3.7/4.2                                           | 4.2/6.6                                                                       | -                                                        | -                                     | -                                                         | -                                    | 3.2/3.6                                                   | 3.6/4.0                                                                       | -                                                        | 3.2/3.4                                                | 3.5/3.9                                                                    | -                                                     | -                             | 3.8/4.2                                                 | 4.2/6.7                                                                     | -                                                      | -                                                          | -                                                          | -                                                          |
| 0.5 FSC threshold, masked/unmasked                  |                               |                                                   |                                                                               |                                                          |                                       |                                                           |                                      |                                                           |                                                                               |                                                          |                                                        |                                                                            |                                                       |                               |                                                         |                                                                             |                                                        |                                                            |                                                            |                                                            |
| Map sharpening <i>B</i> factor (Å <sup>2</sup> )    | -57                           | -62                                               | -73                                                                           | -169                                                     | -125                                  | -114                                                      | -53                                  | -61                                                       | -63                                                                           | -185                                                     | -63                                                    | -53                                                                        | -199                                                  | -58                           | -74                                                     | -75                                                                         | -176                                                   | -14.8                                                      | -38.6                                                      | -22.4                                                      |
| Model composition                                   |                               |                                                   |                                                                               |                                                          |                                       |                                                           |                                      |                                                           |                                                                               |                                                          |                                                        |                                                                            |                                                       |                               |                                                         |                                                                             |                                                        |                                                            |                                                            |                                                            |
| Non-hydrogen atoms                                  | -                             | 36,632                                            | 36,737                                                                        | -                                                        | -                                     | -                                                         | -                                    | 36,678                                                    | 36,678                                                                        | -                                                        | 36,937                                                 | 36,917                                                                     | -                                                     | -                             | 36,863                                                  | 36,839                                                                      | -                                                      | -                                                          | -                                                          | -                                                          |
| Protein residues                                    | -                             | 4,800                                             | 4,819                                                                         | -                                                        | -                                     | -                                                         | -                                    | 4,814                                                     | 4,814                                                                         | -                                                        | 4,847                                                  | 4,845                                                                      | -                                                     | -                             | 4,837                                                   | 4,837                                                                       | -                                                      | -                                                          | -                                                          | -                                                          |
| Ligands                                             | -                             | 11                                                | 11                                                                            | -                                                        | -                                     | -                                                         | -                                    | 11                                                        | 11                                                                            | -                                                        | 11                                                     | 11                                                                         | -                                                     | -                             | 11                                                      | 11                                                                          | -                                                      | -                                                          | -                                                          | -                                                          |
| <i>B</i> factors (Å <sup>2</sup> )                  |                               |                                                   |                                                                               |                                                          |                                       |                                                           |                                      |                                                           |                                                                               |                                                          |                                                        |                                                                            |                                                       |                               |                                                         |                                                                             |                                                        |                                                            |                                                            |                                                            |
| Protein                                             | -                             | 148.21                                            | 173.69                                                                        | -                                                        | -                                     | -                                                         | -                                    | 159.65                                                    | 131.51                                                                        | -                                                        | 219.08                                                 | 137.28                                                                     | -                                                     | -                             | 145.65                                                  | 207.29                                                                      | -                                                      | -                                                          | -                                                          | -                                                          |
| Ligand                                              | -                             | 87.60                                             | 111.04                                                                        | -                                                        | -                                     | -                                                         | -                                    | 85.50                                                     | 66.60                                                                         | -                                                        | 86.12                                                  | 64.63                                                                      | -                                                     | -                             | 64.93                                                   | 116.50                                                                      | -                                                      | -                                                          | -                                                          | -                                                          |
| R.m.s. deviations                                   |                               |                                                   |                                                                               |                                                          |                                       |                                                           |                                      |                                                           |                                                                               |                                                          |                                                        |                                                                            |                                                       |                               |                                                         |                                                                             |                                                        |                                                            |                                                            |                                                            |
| Bond lengths (Å)                                    | -                             | 0.01                                              | 0.005                                                                         | -                                                        | -                                     | -                                                         | -                                    | 0.010                                                     | 0.004                                                                         | -                                                        | 0.01                                                   | 0.004                                                                      | -                                                     | -                             | 0.010                                                   | 0.004                                                                       | -                                                      | -                                                          | -                                                          | -                                                          |
| Bond angles (°)                                     | -                             | 1.207                                             | 0.892                                                                         | -                                                        | -                                     | -                                                         | -                                    | 1.287                                                     | 0.640                                                                         | -                                                        | 1.267                                                  | 0.837                                                                      | -                                                     | -                             | 1.231                                                   | 0.811                                                                       | -                                                      | -                                                          | -                                                          | -                                                          |
| Validation                                          |                               |                                                   |                                                                               |                                                          |                                       |                                                           |                                      |                                                           |                                                                               |                                                          |                                                        |                                                                            |                                                       |                               |                                                         |                                                                             |                                                        |                                                            |                                                            |                                                            |
| MolProbity score                                    | -                             | 1.23                                              | 1.04                                                                          | -                                                        | -                                     | -                                                         | -                                    | 1.20                                                      | 1.48                                                                          | -                                                        | 1.18                                                   | 1.05                                                                       | -                                                     | -                             | 1.52                                                    | 1.16                                                                        | -                                                      | -                                                          | -                                                          | -                                                          |
| Clashscore                                          | -                             | 2.42                                              | 1.98                                                                          | -                                                        | -                                     | -                                                         | -                                    | 2.71                                                      | 4.94                                                                          | -                                                        | 2.49                                                   | 2.60                                                                       | -                                                     | -                             | 3.33                                                    | 2.77                                                                        | -                                                      | -                                                          | -                                                          | -                                                          |
| Poor rotamers (%)                                   | -                             | 1.39                                              | 1.26                                                                          | -                                                        | -                                     | -                                                         | -                                    | 0.74                                                      | 1.94                                                                          | -                                                        | 0.65                                                   | 0.76                                                                       | -                                                     | -                             | 1.86                                                    | 1.10                                                                        | -                                                      | -                                                          | -                                                          | -                                                          |
| Ramachandran plot                                   |                               |                                                   |                                                                               |                                                          |                                       |                                                           |                                      |                                                           |                                                                               |                                                          |                                                        |                                                                            |                                                       |                               |                                                         |                                                                             |                                                        |                                                            |                                                            |                                                            |
| Favored (%)                                         | -                             | 97.52                                             | 98.35                                                                         | -                                                        | -                                     | -                                                         | -                                    | 97.25                                                     | 98.43                                                                         | -                                                        | 97.19                                                  | 98.40                                                                      | -                                                     | -                             | 97.08                                                   | 97.70                                                                       | -                                                      | -                                                          | -                                                          | -                                                          |
| Allowed (%)                                         | -                             | 2.38                                              | 1.63                                                                          | -                                                        | -                                     | -                                                         | -                                    | 2.68                                                      | 1.53                                                                          | -                                                        | 2.77                                                   | 1.58                                                                       | -                                                     | -                             | 2.88                                                    | 2.23                                                                        | -                                                      | -                                                          | -                                                          | -                                                          |
| Disallowed (%)                                      | -                             | 0.11                                              | 0.02                                                                          | -                                                        | -                                     | -                                                         | -                                    | 0.06                                                      | 0.04                                                                          | -                                                        | 0.04                                                   | 0.02                                                                       | -                                                     | -                             | 0.04                                                    | 0.06                                                                        | -                                                      | -                                                          | -                                                          | -                                                          |

**Supplementary Table 1: Cryo-EM data collection, refinement, and validation statistics.**

## References

1. Shirakihara, Y. *et al.* Structure of a thermophilic F<sub>1</sub>-ATPase inhibited by an epsilon-subunit: deeper insight into the epsilon-inhibition mechanism. *FEBS J* **282**, 2895-2913, doi:10.1111/febs.13329 (2015).
