# Supplementary material for: Changes within the central stalk of E. coli F1Fo ATP synthase observed after addition of ATP
Source: PubMed Central journal article supplement (PMC9834311; doi:10.1038/s42003-023-04414-z), 2023-01-11
Supplement: 42003_2023_4414_MOESM3_ESM.pdf [file 42003_2023_4414_MOESM3_ESM.pdf]

## Description of Additional Supplementary Files

**File name:** Supplementary Data 1

**Description:** PDB atomic model - State 2 down (composite map).

**File name:** Supplementary Data 2

**Description:** MRC map - State 2 down.

**File name:** Supplementary Data 3

**Description:** PDB atomic model - State 2 half up (composite map).

**File name:** Supplementary Data 4

**Description:** MRC map - State 2 half up.

**File name:** Supplementary Data 5

**Description:** Uncropped SDS PAGE in Figure 7d.

**File name:** Supplementary Data 6

**Description:** Values of chart in Figure 7e.
